# Supplementary material for: Infiltrative Hepatocellular Carcinoma: Transcatheter Arterial Chemoembolization Versus Hepatic Arterial Infusion Chemotherapy
Source: PubMed Central journal article supplement (PMC8716800; doi:10.3389/fonc.2021.747496), 2021-12-16

# **Infiltrative Hepatocellular Carcinoma: Transcatheter Arterial Chemoembolization versus Hepatic Arterial Infusion Chemotherapy**

## **1. Supplementary Methods**

### **1.1 Assessment criteria of infiltrative HCC**

Assessment criteria of infiltrative hepatocellular carcinoma: 1) diagnosed with HCC; 2) incomplete or missing capsule; 3) poor demarcation and permeating appearance on cross sectional imaging; 4) hypointense on T1WI and homogeneous and mild to moderately hyperintense on T2WI of MRI scanning image; 5) initial post-contrast images may show “miliary enhancement;” and 6) usually company with portal vein tumor thrombus.

### **1.2 Typical imaging present of infiltrative HCC**

There are multiple masses and nodules in the liver, the larger ones are located under the capsule of the right lobe of the liver. The contour is not smooth, involving the liver capsule. Furthermore, the larger cross-section area is about 85 mm × 54 mm, showing multi-nodule fusion and obviously uneven enhancement in enhanced arterial phase, decreased enhancement in the portal phase, and delayed phase (Figure 1).

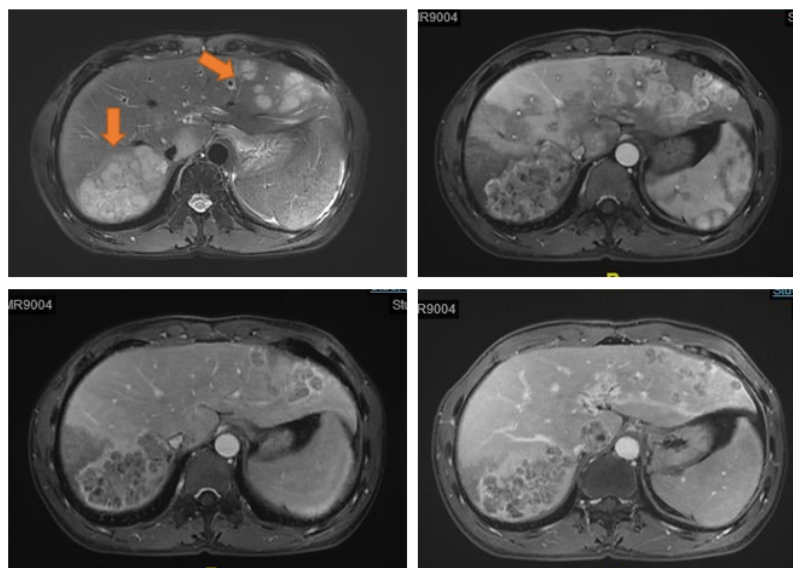

## 2. Supplementary Table

**2.1 Table E1.** The recent advances in clinical studies involving the HAIC for HCC.

**2.2 Table E2.** Baseline characteristics between the training set and validation set.

**2.3 Table E3.** Performance of models and clinical indices.

**Table E1.** The recent advances in clinical studies involving the HAIC for HCC.

| Authors                 | Year | Sample size | Treatment                                               | Size (cm) | Stage | Median OS (months) | ORR (%)   |
|-------------------------|------|-------------|---------------------------------------------------------|-----------|-------|--------------------|-----------|
| Peter J. Kneuert [9]    | 2012 | 75          | DEB-TACE /C-TACE, Y <sup>90</sup> radioembolization     | 9.5       | C     | 10                 | 33.3      |
| Kichang Han [10]        | 2014 | 46          | TACE                                                    | 15        | C     | 5.7                | 18.0      |
| Nima Kokabi [11]        | 2015 | 30          | Y <sup>90</sup> radioembolization                       | 9.2       | C     | 13                 | NA        |
| McDevitt. et al. [12]   | 2017 | 50          | Y <sup>90</sup> radioembolization, Drug-eluting embolic | 10.5      | C     | 9.9/8.1            | 33.0      |
| Zi-shu Zhang [13]       | 2019 | 89          | DEB-TACE /C-TACE                                        | 11.2/10.7 | B, C  | NA                 | 10.7/12.1 |
| Michael J Nisiewicz[14] | 2021 | 53          | TARE                                                    | 10.8      | C     | 16.2               | 54.1      |

**Table E2.** Baseline characteristics between the training set and validation set.

| <b>Variables</b>                                   | <b>Training Set (n = 128)</b> | <b>Validation Set (n = 32)</b> | <b>P Value</b>      |
|----------------------------------------------------|-------------------------------|--------------------------------|---------------------|
| <b>Demographic and history</b>                     |                               |                                |                     |
| Mean age ± SD (years)                              | 50.9±10.7                     | 49.2±10.9                      | 0.764 <sup>a</sup>  |
| Sex                                                |                               |                                | 0.015 <sup>b</sup>  |
| Male                                               | 119 (93.0)                    | 26 (78.8)                      |                     |
| Female                                             | 9 (7.0)                       | 7 (21.2)                       |                     |
| Mean BMI ± SD (kg/m <sup>2</sup> )                 | 22.5±6.2                      | 21.8±5.5                       | 0.514 <sup>a</sup>  |
| Performance status                                 |                               |                                | 0.102 <sup>b</sup>  |
| 0                                                  | 122 (95.3)                    | 28(87.5)                       |                     |
| 1                                                  | 6 (4.7)                       | 4 (12.5)                       |                     |
| Comorbidities                                      |                               |                                | 0.903 <sup>b</sup>  |
| Absence                                            | 15 (11.7)                     | 4 (12.5)                       |                     |
| Presence                                           | 113 (88.3)                    | 28 (87.5)                      |                     |
| Etiology                                           |                               |                                | <0.001 <sup>b</sup> |
| HBV                                                | 120 (93.6)                    | 19 (59.4)                      |                     |
| Other                                              | 8 (6.4)                       | 13 (40.6)                      |                     |
| Cirrhosis                                          |                               |                                | 1.000 <sup>b</sup>  |
| Absence                                            | 120 (93.6)                    | 120 (93.6)                     |                     |
| Presence                                           | 8 (6.4)                       | 8 (6.4)                        |                     |
| CTP grade                                          |                               |                                | 0.800 <sup>b</sup>  |
| 5                                                  | 125 (97.7)                    | 31 (96.9)                      |                     |
| 6-7                                                | 3 (2.3)                       | 1 (3.1)                        |                     |
| Mean ALBI score ± SD                               | -2.65±0.21                    | -2.59±0.32                     | 0.478               |
| Median AFP level (ng/ml)                           | 2289.25 (3.2-121000)          | 3578.14(4.8-121000)            | 0.212 <sup>a</sup>  |
| <b>Tumor data</b>                                  |                               |                                |                     |
| Mean maximal tumor diameter ± SD (cm)              | 10.8±2.3                      | 11.1±3.4                       | 0.788 <sup>a</sup>  |
| No. of tumors                                      |                               |                                | 0.129 <sup>b</sup>  |
| Single                                             | 27 (78.8)                     | 3 (58.8)                       |                     |
| Multiple                                           | 101 (21.2)                    | 29 (41.2)                      |                     |
| Vascular invasion                                  |                               |                                | 0.069 <sup>b</sup>  |
| Absence                                            | 50 (39.1)                     | 7 (17.9)                       |                     |
| Presence                                           | 78 (60.9)                     | 25 (72.1)                      |                     |
| Metastasis                                         |                               |                                | 0.097               |
| Absence                                            | 69 (40.3)                     | 12 (40.3)                      |                     |
| Presence                                           | 59 (59.7)                     | 20 (59.7)                      |                     |
| <b>Laboratory findings</b>                         |                               |                                |                     |
| Mean albumin level ± SD (g/L)                      | 40.3±3.3                      | 39.0±3.5                       | 0.492 <sup>a</sup>  |
| Median total bilirubin level (μmol/L)              | 19.3 (2.2-62.9)               | 18.4 (3.7-62.1)                | 0.971 <sup>a</sup>  |
| Median ALT (U/L) (range)                           | 89.5 (8.1-182.5)              | 91.4 (9.6-212.3)               | 0.681 <sup>a</sup>  |
| Median AST (U/L) (range)                           | 56.7 (12.9-199.3)             | 58.2 (8.8-187.6)               | 0.219 <sup>a</sup>  |
| Median platelet counts (×10 <sup>9</sup> ) (range) | 248 (67-367)                  | 256 (56-385)                   | 0.562 <sup>a</sup>  |
| Mean INR ± SD                                      | 1.13±0.21                     | 1.15±0.32                      | 0.898 <sup>a</sup>  |
| Sessions                                           |                               |                                | 0.933 <sup>b</sup>  |

|                            |            |            |                    |
|----------------------------|------------|------------|--------------------|
| <3                         | 85 (66.4)  | 21 (65.6)  |                    |
| >3                         | 43 (33.6)  | 11 (34.4)  |                    |
| Complications <sup>§</sup> | 2/128(1.6) | 1/32 (3.1) | 0.490 <sup>b</sup> |
| Follow-up (years)          |            |            | 0.787 <sup>a</sup> |
| Median                     | 19.8       | 18.7       |                    |
| Range                      | 2.5-57.8   | 3.2-55.6   |                    |

Note.—Except where indicated, data are numbers of patients. Data in parentheses are percentages and were calculated using the total number of patients in each group as the denominator. SD = standard deviation.  $P < 0.05$  indicates a significant difference.

<sup>a</sup>Student's  $t$  test

<sup>b</sup>Pearson  $\chi^2$  test

<sup>§</sup>Data in parentheses are percentages.

BMI, body mass index; PS, performance status; HBV, viral hepatitis type B; AFP,  $\alpha$ -fetoprotein; ALBI, albumin-bilirubin; ALB, albumin; ALT, alanine aminotransferase; AST, aspartate aminotransferase; PT, prothrombin time; INR, international normalized ratio; TBIL, total bilirubin; PLT, platelet.

**Table E3.** Performance of models and clinical indices.

| <b>Model and clinical indices</b> | <b>C-index</b> | <b>95% CI</b> | <b>P value*</b> | <b>Wald test</b> | <b>LR test</b> | <b>AIC</b> |
|-----------------------------------|----------------|---------------|-----------------|------------------|----------------|------------|
| Nomogram 1 in TS                  | 0.789          | 0.722, 0.814  | 1.000           | 21.24            | 40.21          | 526.47     |
| Nomogram 1 in VS                  | 0.757          | 0.717, 0.787  | 0.515           | 37.51            | 20.78          | 558.56     |
| Nomogram 2 in TS                  | 0.722          | 0.685, 0.784  | 0.215           | 11.52            | 19.36          | 653.14     |
| Nomogram 2 in VS                  | 0.707          | 0.652, 0.743  | 0.187           | 10.78            | 15.64          | 689.37     |
| TNM system                        | 0.590          | 0.532, 0.628  | < 0.001         | 11.24            | 10.24          | 798.25     |
| ALBI grade                        | 0.524          | 0.517, 0.586  | < 0.001         | 9.78             | 8.64           | 882.47     |
| AFP level                         | 0.504          | 0.457, 0.553  | < 0.001         | 16.63            | 56.47          | 1026.24    |

Nomogram 1, all variables; Nomogram 2, pre-treatment variables; TS, Training dataset; VS, Validation dataset; AIC: Akaike Information Criterion; TNM: Tumor-Node-Metastasis.

\*Other models compared with Nomogram in the training set.

### 3. Supplementary Figure

3.1 Figure E1. Kaplan-Meier analyses show comparative OS results in different ALBI grade subgroups.

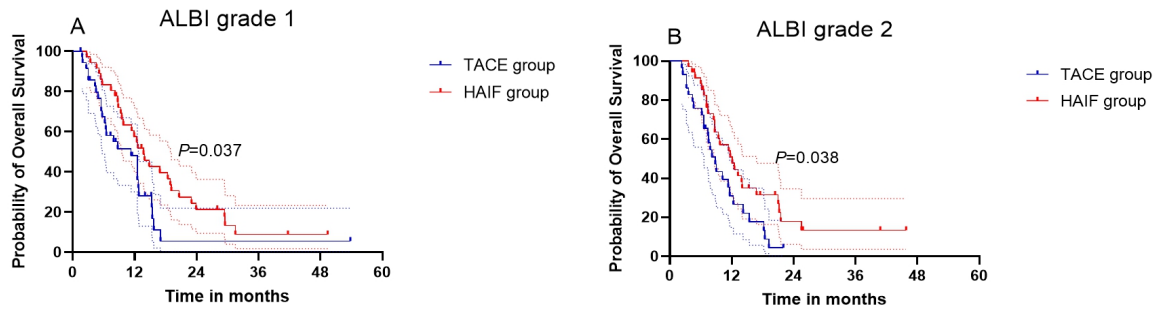

Supplement: DataSheet_1.pdf [file DataSheet_1.pdf]
